# Supplementary material for: Genome-wide survey of sucrose non-fermenting 1-related protein kinase 2 in Rosaceae and expression analysis of PbrSnRK2 in response to ABA stress
Source: BMC Genomics. 2020 Nov 10;21:781. doi: 10.1186/s12864-020-07201-w (PMC7653828; doi:10.1186/s12864-020-07201-w)
Supplement: Supplementary file 4 — Additional file 4: Table S1. Sequence identity of protein sequences between PbrSnRK2s and AtSnRK2s based on pairwise comparison. [file 12864_2020_7201_MOESM4_ESM.xlsx]

## Sheet: Sheet1
Sequence identity of protein sequences between PbrSnRK2s and AtSnRK2s based on pairwise comparison
	PbrSnRK2.1	PbrSnRK2.2	PbrSnRK2.3	PbrSnRK2.4	PbrSnRK2.5	PbrSnRK2.6	PbrSnRK2.7	PbrSnRK2.8	PbrSnRK2.9	PbrSnRK2.10
AtSnRK2.1	0.6904	0.7119	0.6525	0.5581	0.4193	0.3711	0.5347	0.4597	0.4788	0.3266
AtSnRK2.2	0.5659	0.5741	0.6369	0.5312	0.4065	0.3631	0.7307	0.6341	0.5637	0.438
AtSnRK2.3	0.5868	0.5797	0.662	0.5485	0.4377	0.3823	0.7665	0.663	0.5789	0.451
AtSnRK2.4	0.7445	0.7978	0.6344	0.5391	0.407	0.3396	0.5411	0.4308	0.4447	0.2933
AtSnRK2.5	0.7084	0.7639	0.651	0.55	0.4361	0.3722	0.5523	0.4433	0.475	0.3253
AtSnRK2.6	0.598	0.6125	0.6685	0.5635	0.4448	0.3812	0.7222	0.6209	0.663	0.5205
AtSnRK2.7	0.571	0.5824	0.6667	0.5829	0.44	0.4657	0.5461	0.4472	0.4886	0.3316
AtSnRK2.8	0.5985	0.6278	0.683	0.6443	0.4942	0.4253	0.553	0.4643	0.5	0.3447
AtSnRK2.9	0.6285	0.6921	0.6265	0.5693	0.4372	0.3743	0.5269	0.4178	0.4461	0.3093
AtSnRK2.10	0.7263	0.7978	0.6492	0.554	0.4183	0.3657	0.5413	0.4447	0.4765	0.33
