# Supplementary material for: Genome-wide survey of sucrose non-fermenting 1-related protein kinase 2 in Rosaceae and expression analysis of PbrSnRK2 in response to ABA stress
Source: BMC Genomics. 2020 Nov 10;21:781. doi: 10.1186/s12864-020-07201-w (PMC7653828; doi:10.1186/s12864-020-07201-w)
Supplement: Supplementary file 5 — Additional file 5: Table S2. Number of SnRK2 genes from different origins in eight Rosaceae genomes. [file 12864_2020_7201_MOESM5_ESM.xlsx]

## Sheet: Table 
Table 2 Numbers of SnRK2 genes from different origins in eight Roseceae genomes
Species	No. of SnRK2 genes	No. of SnRK2genes from different origins (percentage)
		Transposed	WGD	Tandem	Proximal	Dispersed
Chinese white pear	10	1 (10)	6 (60)	1 (10)	2 (20)	0
Apple	14	0	12 (86)	0	1 (7)	1 (7)
Peach	7	0	4 (57.1)	0	1 (14.3)	2 (28.6)
Strawberry	8	3 (37.5)	4 (50)	1 (12.5)	0	0
Chinese plum	7	2 (28.6)	2 (28.6)	1 (14.2)	0	2 (28.6)
Black raspberry	5	0	2 (40)	0	1 (20)	2 (40)
Cherry	7	2 (28.6)	2 (28.6)	1 (14.2)	0	2 (28.6)
European pear	13	2 (15.4)	1 (7.7)	0	1 (7.7)	4 (30.8)
